# Supplementary material for: Accuracy of Physician Estimates of Out-of-Pocket Costs for Medication Filling
Source: PubMed Central journal article supplement (PMC8571653; doi:10.1001/jamanetworkopen.2021.33188), 2021-11-05
Supplement: jamanetwopen-e2133188-s001.pdf [file jamanetwopen-e2133188-s001.pdf]

## Supplemental Online Content

Sloan CE, Millo L, Gutterman S, Ubel PA. Accuracy of physician estimates of out-of-pocket costs for medication filling. *JAMA Netw Open*. 2021;4(11):e2133188.  
doi:10.1001/jamanetworkopen.2021.33188

**eFigure.** Survey Sent to Primary Care Physicians

**eTable 1.** Vignette Responses Defined to Be Correct in Sensitivity Analysis

**eTable 2.** Rotated Factor Loadings for Physician Attitudes Toward Cost Conversations

This supplemental material has been provided by the authors to give readers additional information about their work.

eFigure. Survey sent to primary care physicians

## Conversations About Cost in the Clinic: The Physician's Perspective

Dear Colleague:

In recent years, an increasing number of Americans have enrolled in health insurance plans that carry high out-of-pocket expenses. As a result, some patients experience a sizeable financial burden associated with their care. Currently, little is known about physicians' experiences discussing these costs with their patients.

With your answers to this anonymous survey, I hope to understand how physicians think about discussing out-of-pocket costs with their patients.

Before you take the survey, there are a few things you should know:

1. This survey is **anonymous**.
2. It should take you **no more than 8 minutes** to complete.
3. You can keep this \$5 for completing the survey.
4. If you are unable to complete the survey, **please return this \$5 using the enclosed envelope**.

Please fill out the questionnaire and return it in the self-addressed, stamped envelope. So we don't mail you another survey, please also mail back the enclosed stamped postcard separately from your survey.

Your response is critical. It is only with your personal help that our experiences as physicians can be better understood.

Thank you,

Caroline Sloan, MD  
Department of Medicine  
Duke University Health System  
Durham VA Medical Center  
[caroline.sloan@duke.edu](mailto:caroline.sloan@duke.edu)

First, please check the corresponding box to answer some questions about your beliefs and opinions. There are no right or wrong answers.

|                                                                                                   | Strongly Disagree        | Disagree                 | Somewhat Disagree        | Somewhat Agree           | Agree                    | Strongly Agree           |
|---------------------------------------------------------------------------------------------------|--------------------------|--------------------------|--------------------------|--------------------------|--------------------------|--------------------------|
| There is nothing I can do to lower patients' out-of-pocket costs.                                 | <input type="checkbox"/> | <input type="checkbox"/> | <input type="checkbox"/> | <input type="checkbox"/> | <input type="checkbox"/> | <input type="checkbox"/> |
| Doctors have an obligation to initiate discussions about out-of-pocket costs when writing orders. | <input type="checkbox"/> | <input type="checkbox"/> | <input type="checkbox"/> | <input type="checkbox"/> | <input type="checkbox"/> | <input type="checkbox"/> |
| I know approximately how much my patients are spending on their medical care.                     | <input type="checkbox"/> | <input type="checkbox"/> | <input type="checkbox"/> | <input type="checkbox"/> | <input type="checkbox"/> | <input type="checkbox"/> |
| It is not my job to deal with patients' out-of-pocket costs.                                      | <input type="checkbox"/> | <input type="checkbox"/> | <input type="checkbox"/> | <input type="checkbox"/> | <input type="checkbox"/> | <input type="checkbox"/> |
| My patients expect me to solve their cost-related issues during or right after clinic visits.     | <input type="checkbox"/> | <input type="checkbox"/> | <input type="checkbox"/> | <input type="checkbox"/> | <input type="checkbox"/> | <input type="checkbox"/> |
| I have a hard time advising my patients on their out-of-pocket costs.                             | <input type="checkbox"/> | <input type="checkbox"/> | <input type="checkbox"/> | <input type="checkbox"/> | <input type="checkbox"/> | <input type="checkbox"/> |

Please check the corresponding box to rate how much you agree or disagree that each of the following is a barrier that prevents you from discussing out-of-pocket costs.

|                                                                         | Strongly Disagree        | Disagree                 | Somewhat Disagree        | Somewhat Agree           | Agree                    | Strongly Agree           |
|-------------------------------------------------------------------------|--------------------------|--------------------------|--------------------------|--------------------------|--------------------------|--------------------------|
| I feel uncomfortable discussing out-of-pocket costs with my patients.   | <input type="checkbox"/> | <input type="checkbox"/> | <input type="checkbox"/> | <input type="checkbox"/> | <input type="checkbox"/> | <input type="checkbox"/> |
| I do not have enough time to discuss patients' out-of-pocket costs.     | <input type="checkbox"/> | <input type="checkbox"/> | <input type="checkbox"/> | <input type="checkbox"/> | <input type="checkbox"/> | <input type="checkbox"/> |
| I usually don't know how to answer questions about out-of-pocket costs. | <input type="checkbox"/> | <input type="checkbox"/> | <input type="checkbox"/> | <input type="checkbox"/> | <input type="checkbox"/> | <input type="checkbox"/> |

Now, imagine the following:

- You are about to prescribe the oral PCSK 9 inhibitor evolocumab to your patient, Ms. Gray.
- One month's supply of evolocumab costs \$1,000. She asks how much she'll have to pay out of pocket.
- Luckily, you have access to her private insurance information. Evolocumab is a tier 4 drug, and her insurance runs from January to December.

|                                           |                                                 |                                                            |                                                                                                                                                                                                 |                                                                    |                                                                                                   |
|-------------------------------------------|-------------------------------------------------|------------------------------------------------------------|-------------------------------------------------------------------------------------------------------------------------------------------------------------------------------------------------|--------------------------------------------------------------------|---------------------------------------------------------------------------------------------------|
| Estimated monthly premium<br><b>\$100</b> | Deductible<br><b>\$2000</b><br>Individual Total | Out-of-pocket maximum<br><b>\$6000</b><br>Individual Total | Copayments / Coinsurance<br>Emergency room care: \$200 copay<br>Tier 1-3 drugs: \$20 copay<br>Tier 4 drugs: 50% coinsurance<br>Primary doctor: \$30 copay<br>Specialist doctor: 30% coinsurance | Estimated total yearly costs<br><b>ESTIMATE TOTAL YEARLY COSTS</b> | Medical providers & prescription drugs covered<br><b>SEE IF PROVIDERS &amp; DRUGS ARE COVERED</b> |
| <a href="#">QUICK VIEW</a>                | <a href="#">DETAILS</a>                         |                                                            |                                                                                                                                                                                                 | <a href="#">COMPARE</a>                                            | <a href="#">LIKE THIS PLAN</a>                                                                    |

We know these questions are difficult to answer. Please provide your best guess of what her costs will be. Do not include premiums in your cost calculations.

1. It is January 3<sup>rd</sup>. How much will she pay out of pocket for just evolocumab this month?

\$ \_\_\_\_\_ in January  I don't know

2. Now suppose she sees you again in March. Since January, she has had one clinic visit and taken two months' worth of evolocumab. What will she pay out of pocket for just the evolocumab this month?

\$ \_\_\_\_\_ in March  I don't know

3. She also takes three other drugs, all tier 1. What will be the sum of her out-of-pocket costs for **just those three drugs** in March?

\$ \_\_\_\_\_ in March  I don't know

4. Now suppose it's December. Since January, Ms. Gray has taken 11 months' worth of evolocumab. How much will she pay out of pocket for just evolocumab this month?

\$ \_\_\_\_\_ in December  I don't know

Finally, please answer a few questions about yourself:

1. Gender:  Male  Female  Do not wish to answer Other \_\_\_\_\_
2. Are you of Hispanic, Latino/a, or Spanish origin?  Yes  No  Do not wish to answer
3. Race (select all that apply):  Black or African American  Asian  Native Hawaiian/Other Pacific Islander  White  American Indian/Alaska Native  Do not wish to answer Other \_\_\_\_\_
4. Year of birth: \_\_\_\_\_
5. Year of medical school graduation: \_\_\_\_\_
6. Approximate % of your time at work that is spent in:  
a) Outpatient clinical care: \_\_\_\_\_ b) Inpatient clinical care: \_\_\_\_\_  
c) Other (e.g. education, administration, research): \_\_\_\_\_
7. Approximate % of patients in your practice who are covered by:  
a) Medicaid: \_\_\_\_\_ b) Uninsured: \_\_\_\_\_  
c) Private insurance or Medicare: \_\_\_\_\_ d) Other: \_\_\_\_\_
8. Do you work in an academic medical center or teaching hospital?  
 Yes  No
9. Does your clinic have a social worker or financial counselor who can discuss financial issues with patients?  
 Yes  No  Unsure
10. Do you use an electronic health record (EHR)?  
 Yes  No **[IF NO, SKIP TO QUESTION 13]**
11. Has your EHR enabled you to have more informed conversations about costs with your patients?  
 Yes  No  Unsure
12. Does your EHR provide you with any information on out-of-pocket costs associated with your orders (e.g. copayments, retail prices, drug tiers)?  
 Yes  No  Unsure
13. Is there anything else you would like to add about out-of-pocket costs and clinical practice?  
\_\_\_\_\_  
\_\_\_\_\_  
\_\_\_\_\_  
\_\_\_\_\_  
\_\_\_\_\_
14. If you would like to receive additional information about the study or answers to the insurance coverage questions, please provide your email address: \_\_\_\_\_

**eTable 1. Vignette responses defined as correct in sensitivity analysis**

| Numerical responses                                                                                                                                                                                                      | Correct vs Incorrect | Rationale for defining response as correct in the sensitivity analysis | Number of responses |
|--------------------------------------------------------------------------------------------------------------------------------------------------------------------------------------------------------------------------|----------------------|------------------------------------------------------------------------|---------------------|
| <i>Question 1. "It is January 3rd. How much will she pay out of pocket for just evolocumab this month?"</i>                                                                                                              |                      |                                                                        |                     |
| 0                                                                                                                                                                                                                        | Incorrect            | --                                                                     | 1                   |
| 5                                                                                                                                                                                                                        | Incorrect            | --                                                                     | 1                   |
| 20                                                                                                                                                                                                                       | Incorrect            | --                                                                     | 1                   |
| 50                                                                                                                                                                                                                       | Incorrect            | --                                                                     | 2                   |
| 100                                                                                                                                                                                                                      | Incorrect            | --                                                                     | 11                  |
| 250                                                                                                                                                                                                                      | Incorrect            | --                                                                     | 1                   |
| 500                                                                                                                                                                                                                      | Incorrect            | --                                                                     | 110                 |
| 600                                                                                                                                                                                                                      | Incorrect            | --                                                                     | 2                   |
| 1000                                                                                                                                                                                                                     | Correct              | Correct answer                                                         | 192                 |
| 1030                                                                                                                                                                                                                     | Correct              | + primary care visit copay if deductible had been met                  | 1                   |
| 1100                                                                                                                                                                                                                     | Correct              | + monthly premium                                                      | 6                   |
| 1600                                                                                                                                                                                                                     | Incorrect            | --                                                                     | 1                   |
| 2000                                                                                                                                                                                                                     | Incorrect            | --                                                                     | 2                   |
| <i>Question 2. "Now suppose she sees you again in March. Since January, she has had one clinic visit and taken two months' worth of evolocumab. What will she pay out of pocket for just the evolocumab this month?"</i> |                      |                                                                        |                     |
| 0                                                                                                                                                                                                                        | Incorrect            | --                                                                     | 13                  |
| 5                                                                                                                                                                                                                        | Incorrect            | --                                                                     | 1                   |
| 20                                                                                                                                                                                                                       | Incorrect            | --                                                                     | 1                   |
| 50                                                                                                                                                                                                                       | Incorrect            | --                                                                     | 2                   |
| 100                                                                                                                                                                                                                      | Incorrect            | --                                                                     | 15                  |
| 200                                                                                                                                                                                                                      | Incorrect            | --                                                                     | 1                   |
| 250                                                                                                                                                                                                                      | Incorrect            | --                                                                     | 1                   |
| 300                                                                                                                                                                                                                      | Incorrect            | --                                                                     | 2                   |
| 500                                                                                                                                                                                                                      | Correct              | Correct answer                                                         | 228                 |
| 530                                                                                                                                                                                                                      | Correct              | + primary care visit copay                                             | 1                   |
| 600                                                                                                                                                                                                                      | Correct              | + monthly premium                                                      | 4                   |
| 1000                                                                                                                                                                                                                     | Incorrect            | --                                                                     | 33                  |
| 1030                                                                                                                                                                                                                     | Incorrect            | --                                                                     | 1                   |
| 1100                                                                                                                                                                                                                     | Incorrect            | --                                                                     | 1                   |
| 1500                                                                                                                                                                                                                     | Incorrect            | --                                                                     | 1                   |
| 2000                                                                                                                                                                                                                     | Incorrect            | --                                                                     | 3                   |
| 2100                                                                                                                                                                                                                     | Incorrect            | --                                                                     | 1                   |
| 2500                                                                                                                                                                                                                     | Incorrect            | --                                                                     | 1                   |
| 3000                                                                                                                                                                                                                     | Incorrect            | --                                                                     | 1                   |
| <i>Question 3. "She also takes three other drugs, all tier 1. What will be the sum of her out-of-pocket costs for just those three drugs in March?"</i>                                                                  |                      |                                                                        |                     |
| 0                                                                                                                                                                                                                        | Incorrect            | --                                                                     | 6                   |
| 5                                                                                                                                                                                                                        | Incorrect            | --                                                                     | 1                   |
| 12                                                                                                                                                                                                                       | Incorrect            | --                                                                     | 1                   |
| 20                                                                                                                                                                                                                       | Correct              | Included only one tier 1 drug (instead of 3)                           | 1                   |
| 30                                                                                                                                                                                                                       | Incorrect            | --                                                                     | 1                   |
| 60                                                                                                                                                                                                                       | Correct              | Correct answer                                                         | 224                 |

|      |           |                                                 |    |
|------|-----------|-------------------------------------------------|----|
| 90   | Correct   | + primary care visit copay                      | 3  |
| 100  | Incorrect | --                                              | 3  |
| 180  | Incorrect | --                                              | 3  |
| 300  | Incorrect | --                                              | 3  |
| 310  | Incorrect | --                                              | 1  |
| 380  | Incorrect | --                                              | 1  |
| 500  | Incorrect | --                                              | 4  |
| 520  | Correct   | Included only one tier 1 drug + the tier 4 drug | 1  |
| 540  | Incorrect | --                                              | 4  |
| 560  | Correct   | + the tier 4 drug                               | 32 |
| 590  | Correct   | + primary care visit copay + the tier 4 drug    | 1  |
| 1000 | Incorrect | --                                              | 3  |
| 1060 | Incorrect | --                                              | 3  |
| 1130 | Incorrect | --                                              | 1  |
| 1500 | Incorrect | --                                              | 1  |
| 1560 | Incorrect | --                                              | 1  |
| 2060 | Incorrect | --                                              | 1  |

*Question 4. "Now suppose it's December. Since January, Ms. Gray has taken 11 months' worth of evolocumab. How much will she pay out of pocket for just evolocumab this month?"*

|      |           |                   |     |
|------|-----------|-------------------|-----|
| 0    | Correct   | Correct answer    | 210 |
| 5    | Incorrect | --                | 1   |
| 50   | Incorrect | --                | 2   |
| 100  | Correct   | + monthly premium | 10  |
| 200  | Incorrect | --                | 1   |
| 250  | Incorrect | --                | 1   |
| 340  | Incorrect | --                | 1   |
| 500  | Incorrect | --                | 66  |
| 600  | Incorrect | --                | 2   |
| 1000 | Incorrect | --                | 5   |
| 1100 | Incorrect | --                | 1   |
| 6000 | Incorrect | --                | 2   |
| 6500 | Incorrect | --                | 1   |
| 6720 | Incorrect | --                | 1   |

Note: This table excludes "I don't know" and blank responses to vignette questions.

**eTable 2. Rotated factor loadings for physician attitudes toward cost conversations**

|                                                                                                  | Composite category |                    |                        |
|--------------------------------------------------------------------------------------------------|--------------------|--------------------|------------------------|
|                                                                                                  | Duty               | Perceived barriers | Perceived expectations |
| Doctors have an obligation to initiate discussions about out-of-pocket costs when writing orders | -0.5235            |                    |                        |
| There is nothing I can do to lower patients' out-of-pocket costs                                 | 0.3832             |                    |                        |
| It is not my job to deal with patients' out-of-pocket costs                                      | 0.5235             |                    |                        |
| I have a hard time advising my patients on their out-of-pocket costs                             |                    | 0.7662             |                        |
| I do not have enough time to discuss patients' out-of-pocket costs                               |                    | 0.5509             |                        |
| I usually don't know how to answer questions about out-of-pocket costs                           |                    | 0.7881             |                        |
| I know approximately how much my patients are spending on their medical care                     |                    | -0.431             |                        |
| I feel uncomfortable discussing out-of-pocket costs with my patients                             |                    | 0.5134             |                        |
| My patients expect me to solve their cost-related issues during or right after clinic visits     |                    |                    | 0.2542                 |
